# Supplementary material for: Porous polyaniline nanofiber/vanadium pentoxide layer-by-layer electrodes for energy storage
Source: Royal Society of Chemistry journal article supplement (doi:10.1039/c3ta10961e), 2013-01-01
Supplement: c3ta10961e.pdf [file c3ta10961e.pdf]

# Porous Polyaniline Nanofiber/Vanadium Pentoxide

## Layer-by-Layer Electrodes for Energy Storage

*Lin Shao,<sup>1</sup> Ju-Won Jeon<sup>2</sup> and Jodie L. Lutkenhaus<sup>2\*</sup>*

1. Department of Chemical & Environmental Engineering, Yale University, New Haven, Connecticut. 06511
2. Department of Chemical Engineering, Texas A&M University, College Station, Texas. 77843

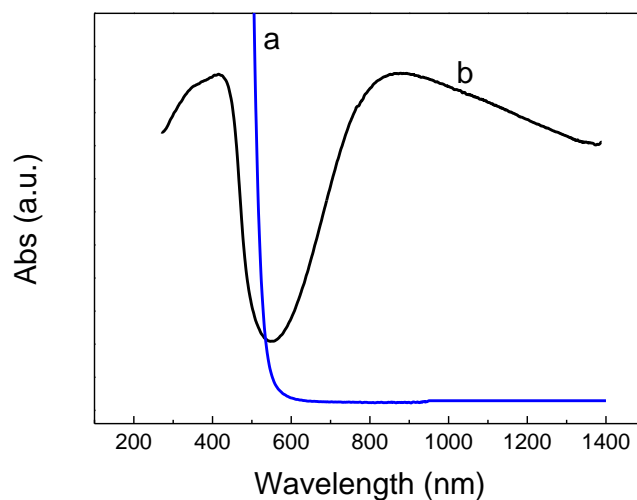

**Figure S1.** UV-Vis spectra of (a)  $V_2O_5$  solution at pH 2.5 and (b) PANI nanofibers in dispersion at pH 2.5.

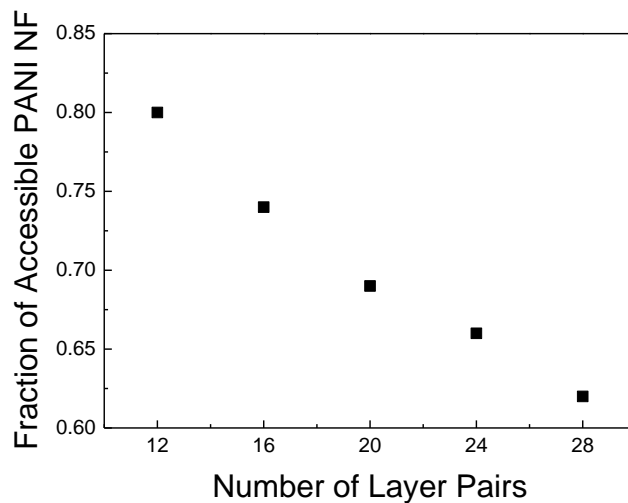

**Figure S2.** Fraction of electrochemically accessible PANI in  $(\text{PANI NF}/\text{V}_2\text{O}_5)_n$  LbL films as determined via UV-Vis spectroscopy. The fraction was calculated as  $(A_{3.5}-A_{2.0})/A_{2.0}$  at  $\lambda=825$  nm.

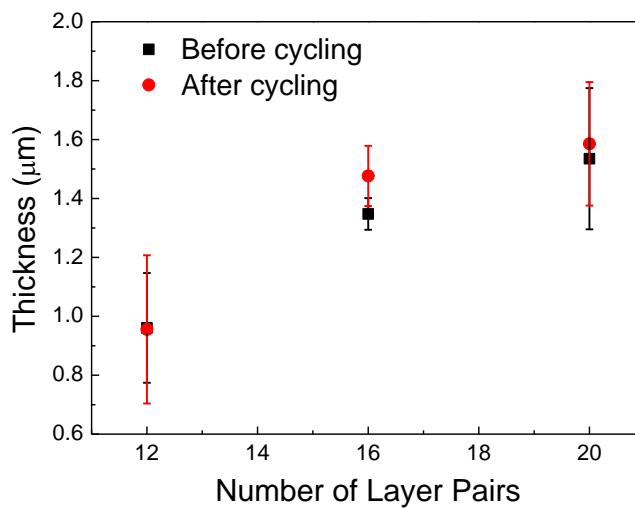

**Figure S3.** Thickness comparison for  $(\text{PANI NF}/\text{V}_2\text{O}_5)_n$  LbL films before and after cycling 500 times.

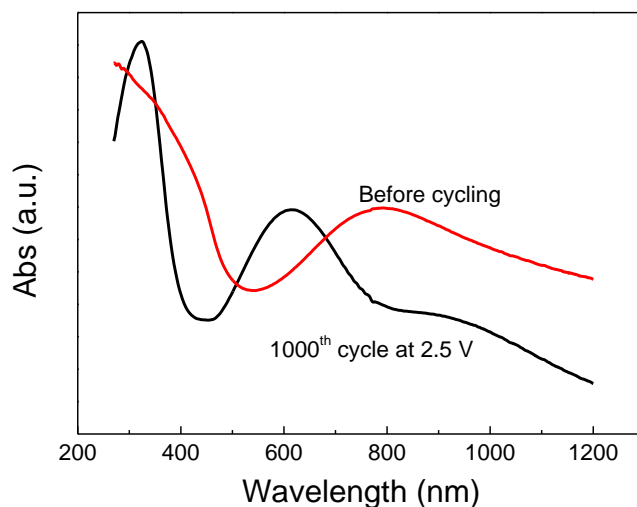

**Figure S4.** UV-Vis spectra of (PANI NF/V<sub>2</sub>O<sub>5</sub>)<sub>16</sub> LbL films before and after 1,000 charge-discharge cycles.

**Table S1.** Charge-storage contributions as a function of scan rate for sample with 16 layer pairs.

| Scan Rate (mV/s) | NonDiffusion-Limited Fraction | Ideal Diffusion-Limited Fraction |
|------------------|-------------------------------|----------------------------------|
| 1                | 0.35                          | 0.65                             |
| 3                | 0.49                          | 0.51                             |
| 5                | 0.55                          | 0.45                             |
| 10               | 0.63                          | 0.37                             |
| 30               | 0.75                          | 0.25                             |
| 50               | 0.79                          | 0.21                             |

**Calculation for the number of Li<sup>+</sup> moles inserted per mole of V<sub>2</sub>O<sub>5</sub> for (PANI NF/V<sub>2</sub>O<sub>5</sub>)<sub>16</sub>**

Electrochemically accessible fraction of PANI NF: 0.74;

Composition from XPS: 40.6 wt% PANI NF and 59.4 wt% V<sub>2</sub>O<sub>5</sub>;

Theoretical capacity of PANI NF: 148 mAh/g;

Theoretical capacity of V<sub>2</sub>O<sub>5</sub> under the assumption of 1 mole electron insertion for per mole of

V<sub>2</sub>O<sub>5</sub>: 147.26 mAh/g;

Factor used for the conversion between units of mAh and C: 3.6, namely 1 C=1/3.6 mAh;

The number of electron inserted for per mole of  $V_2O_5$ : Y;

Therefore, based on the equation:

Faradaic charge transferred for PANI + Faradaic charge transferred for  $V_2O_5$  = Total Faradaic  
charge transferred      Eqn. S1

$$0.74*0.406*148+0.594*147.26*Y=418/3.6 \quad \text{Eqn. S2}$$

$$Y= 0.82.$$
